# Supplementary figures and images for: At the Intersection of Cardiology and Oncology: TGFβ as a Clinically Translatable Therapy for TNBC Treatment and as a Major Regulator of Post-Chemotherapy Cardiomyopathy
Source: Preprints.org preprint supplement (doi:10.20944/preprints202202.0078.v1), 2022-02-07

Figure S1

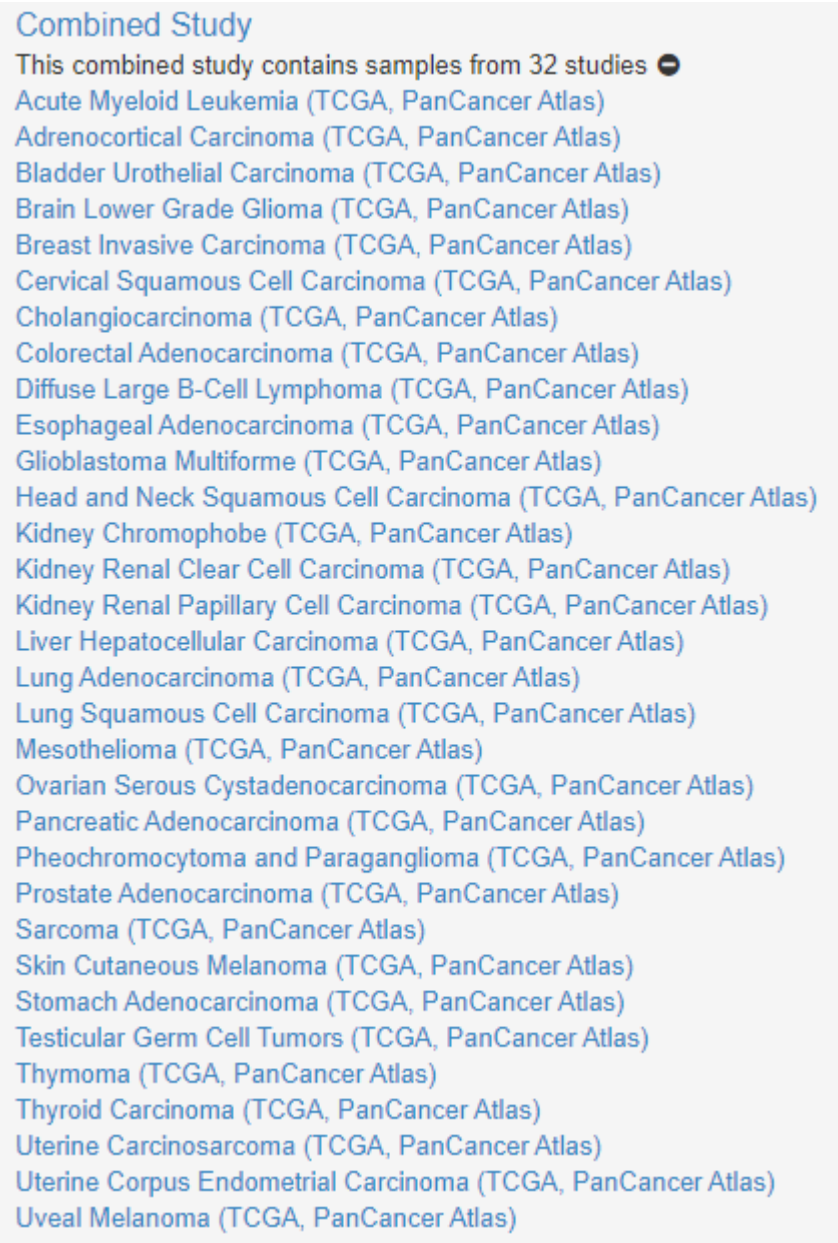

Figure S1: List Cancer Types Across 32 Studies Used for Database Analysis

Supplement: Supplementary file 1 [file supplementary]
